# Supplementary material
Source: ML conference proceedings conference paper supplement (https://www.ecva.net/papers/eccv_2020/papers_ECCV/html/123740562_ECCV_2020_paper.php)
Supplement: Supplementary file 3 [file 123740562-supp.zip]

Archive with 7 entries (6 files):
- 6833-supp/
- 6833-supp/6833-supp.pdf
- __MACOSX/6833-supp/._6833-supp.pdf
- 6833-supp/.DS_Store
- __MACOSX/6833-supp/._.DS_Store
- 6833-supp/ibo2b_supp_720p.mp4
- __MACOSX/6833-supp/._ibo2b_supp_720p.mp4
